# Supplementary material
Source: Elsevier journal article supplement (https://www.sciencedirect.com/science/article/pii/S0034935619300234)
Supplement: mmc1 [file S0034935619300234:mmc1.docx]

**Doctor Evaluador y Revisor de nuestro articulo :**

Ante todo mil gracias por sus correcciones y sugerencias. Totalmente de acuerdo con lo expresado por usted. Esperamos nuestras correcciones estén acorde con lo sugerido y revisado por Usted. Acá nos permitimos darle respuesta a sus revisiones y sugerencias, informarle que ya estas mismas quedaron plasmadas en el artículo y pueden volver a revisarlas.

Un abrazo.

**Abstract**

1. En el objetivo se debe mencionar que el estudio es realizado en residentes de anestesiología previamente entrenados con modelo TEÓRICO y simulado. No solamente modelo simulado. La idea de que usted involucra la teoría antes la simulación es un punto a favor de su estudio.

**Respuesta:** Totalmente de acuerdo con usted, nuestro trabajo consto de una parte teórica y una simulada, ya se incorporó esta parte en el abstract y quedo de la siguiente forma:

“Objetivo: Analizar el éxito, el manejo del equipo de ecografía y la incidencia de complicaciones de los bloqueos supraclaviculares ecoguiados (BSE) en el escenario clínico, realizados por los residentes de anestesiología previamente entrenados con modelo teórico y simulado”

1. En el resultado usted hace referencia al manejo del ultrasonido pero no al éxito del bloqueo guiado por ecografía. Usted menciona este punto en su objetivo pero no lo menciona en su resultado. Si el éxito del bloque es uno de los objetivos, debe mencionarlo en el resultado.

**Respuesta:** De acuerdo con el evaluador, no se ve el resultado de todos los objetivos, pero debido al margen estrecho de palabras, tratamos de resumir y cometimos el error de ser poco específicos. Ya se corrigió y se dejó los resultados de cada objetivo.

“**Resultados**: Se evaluaron 16 residentes, quienes realizaron 156 BSE. Ninguno tenía experiencia previa en bloqueos ecoguiados. El éxito del bloqueo fue del 96.15%, el manejo del equipo fue excelente (86% al 95%) sin diferencias significativas entre los residentes. (*p*=0.61) La incidencia de complicaciones fue de 0.64% (n=1) correspondiente a punciòn arterial”

**Introducción**

a) Se debe ampliar la introducción con artículos que hagan referencia a la experiencia previa de modelos simulados y bloqueo de nervio periférico. Que artículos hay en la literatura? Si la literatura es escasa entonces mencione esta limitación en la búsqueda de la bibliografía.

**Respuesta:** Agradecemos esta recomendación y la recibimos completamente, incorporamos referencia bibliográfica que apoya el beneficio del entrenamiento en modelo simulado.

b) Es oportuno mencionar las ventajas de la simulación (feedback inmediato, espacio de práctica sin posibilidad de daño al paciente entre otros).

**Respuesta:** De acuerdo con la sugerencia del evaluador, nos acogemos a sus recomendaciones y adicionamos un párrafo en la introducción, se adicionaron dos referencias bibliográficas que apoyan el párrafo, el cual queda de la siguiente forma:

“El entrenamiento en modelos simulados ofrece varias ventajas, entre estas se encuentran la posibilidad de mejorar las habilidades no técnicas como las relaciones interpersonales, toma de decisiones, conciencia de la situación…..”

c) No es claro cuál es su objetico principal. El manejo del ultrasonido o el éxito del bloqueo nervioso periférico. Es importante aclarar cuál es el objetivo primario y cuál es el objetivo secundario. Es la incidencia de complicaciones un objetivo secundario?

**Respuesta:** De acuerdo con el evaluador, no se ve claridad en el objetivo, cometimos el error de ser poco específicos. Ya se corrigió y se dejó de la siguiente manera:

“Nuestro objetivo principal fue evaluar el éxito del BNSE del plexo braquial y como objetivos secundarios evaluar el manejo del equipo y la incidencia de complicaciones en residentes previamente entrenados con modelo teórico y simulado.”

**Metodología:**

1. En el artículo NO se hace referencia a que modelo de simulación se utilizó. Utilizaron maniquíes de alta fidelidad, fantoma o MiniSim simuladores?

**Respuesta**: Nos acogemos y agradecedemos su recomendación, ampliamos esta parte en la metodología y adicionamos la siguiente información consignada en el manuscrito:

“Se usaron modelos simulados reales Branched Two Vessel Blue Phantom (CAE Healthcare®) para hidrodisección, Phantom orgánicos animales (pechugas de pollo) para punciones y visualización de la aguja, adicionalmente usamos fantomas de la marca LM® para visualización de la aguja e interpretación de la imagen”

b) Durante el estudio usted no hace referencia a la distribución del anestésico en el plexo braquial. Una de las ventajas del bloqueo de nervio periférico con ultrasonido es que se puede visualizar la correcta distribución del anestésico en tiempo real, permitiendo el reposicionamiento de la aguja en caso de mala distribución. Considero usted este parámetro en la evaluación del bloqueo ?

**Respuesta:** El evaluador tiene razón; en respuesta a su pregunta, Nosotros SI tuvimos en cuenta este parámetro en nuestro estudio y está nominado como “HIDRODISECCION”, hemos considerado modificar el termino hidrodisección que puede ser confuso y acogernos al término “distribución del anestésico local”, el cual se puede ver consignado en metodología y en las tablas

1. Durante el estudio, los residentes tenían conocimiento previo a los parámetros evaluados durante el bloqueo? Esto podría influenciar el resultado de su estudio.

**Respuesta:** Es una anotación totalmente valida; dando respuesta a la pregunta del evaluador queremos consignar que los residentes; NO tenían conocimiento en BSE ni en los parámetros evaluados, quedo consignado de la siguiente manera:

“Ninguno de los participantes tenía experiencia en abordaje de plexo braquial por ecografía ni conocimiento previo a los parámetros evaluados durante el bloqueo ecoguiado”

1. En el artículo no se menciona que tipo de anestésico local, volumen empleado y concentración. Solo se menciona la lidocaína y la bupivacaina en las tablas.

**Respuesta:** El evaluador tiene razón, pero por el tipo de trabajo, nosotros no proponíamos ninguna técnica anestésica y quien definía tipo y volumen del anestésico, era el anestesiólogo con el residente a cargo como lo describimos en este apartado. Por tal motivo solo reportamos el tipo de anestésico. Y creemos valido la sugerencia del evaluador y adicionalmente en la tabla Número tres (3), reportamos concentración, y promedios de volumen anestésico. Igualmente ajustamos por concentración y éxito.

e) Usted menciona que uno de los objetivos es evaluar el éxito bloqueo guiado por ecografia? como define usted éxito? Se debe mencionar la definición del bloqueo satisfactorio, insatisfactorio o fallido.

Respuesta: Totalmente de acuerdo con el evaluador, definimos de la siguiente manera y quedo consignado en el manuscrito

1. Bloqueo exitoso: Definido como la calificación excelente en cada logro (Manejo de equipo, Optimización de imàgen, Interpretación de imagen y Visualización de aguja) adicionalmente que se obtuviera el suficiente bloqueo motor y sensitivo para lograr realizar el procedimiento o la analgesia esperada en el pos operatorio, adicionalmente que no se presentaran complicaciones.
2. Bloqueo insatisfactorio: Definido como la calificación regular en cada logro (Manejo de equipo, Optimización de imagen, Interpretación de imagen y Visualización de aguja) se obtuviera el suficiente bloqueo motor y sensitivo para lograr realizar el procedimiento o la analgesia esperada en el pos operatorio, no presencia de complicaciones.
3. Bloqueo fallido: Definido como la calificación mala en cada logro (Manejo de equipo, Optimización de imagen, Interpretación de imagen y Visualización de aguja) adicionalmente que no se obtuviera el suficiente bloqueo motor y sensitivo para lograr realizar el procedimiento y no analgesia en el pos operatorio o presencia de complicaciones.
4. Se debe referenciar la fecha y el tiempo de la recolección de los datos.

**Respuesta:** Nos acogemos y agradecemos la sugerencia del evaluador, quedo consignado en el manuscrito de la siguiente manera:

“Los datos fueron recolectados desde el 1 de febrero de 2017 hasta 1 de marzo de 2018.”

**Resultados:**

1. Es importante recalcar que en su estudio usted hizo dos intervenciones; la primera fue la sesión teórica (Fase I) y la segunda fue la simulación del bloqueo supraclavicular. Es decir es una gran idea de que usted incluyó un sesión teórica antes de la simulación pero usted no puede asumir que el resultado tanto primario (eficacia del bloqueo) como el secundario (uso del ultrasonido) son el resultado de la simulación. Es el resultado de las dos intervenciones y no es posible cuantificar contribución de cada intervención por separado.

Totalmente de acuerdo y esto no es posible cuantificarlo, por el tipo de estudio, pues no teníamos grupo control y eso se incluyó en la discusión. Lo único que podemos afirmar es que al comparar el éxito con los reportes de literatura podemos decir que la fase teórica y escenario simulado pudo influir en el éxito y aumentar la probabilidad de éxito y disminuir las complicaciones.

1. Existe alguna diferencia entre el bloqueo #1 y el bloqueo # 13 de cada residente en cuanto a la tasa de éxito, el número de intentos y tiempo empleado para cada bloqueo?

No encontramos diferencias al ajustar por número de intentos, tiempo de visualización ni distribución del anestésico local entre los residentes, como lo reportamos en la tabla No 3 en lo basal.

El análisis del éxito del bloqueo entre el primer bloqueo al último bloqueo realizado por cada residente, no presento diferencias significativas respecto al éxito del mismo, solo que la curva en los R1 fue más ascendente. Pero se incluyó análisis en la tabla No. 4 y en los resultados. Igualmente Cuando analizamos específicamente si hay diferencias entre R1 y R3 respecto a éxito de bloqueo según tiempos y numero de intentos, tampoco obtuvimos diferencias significativas. Esto lo reportamos ajustando la tabla Número 4. Se dejó consignado de la siguiente manera en el manuscrito.

“Al ajustar por número de punciones, tiempos de visualización de aguja y de hidrodisección no encontramos diferencias significativas entre R1 y R3. (p= 0,6154, 0,6275 y 0,356). No se presentaron diferencias significativas entre el primer bloqueo y el último realizado por cada evaluado, dado que los únicos bloqueos fallidos se presentaron en los R1(n=5) y R3 (n=1). Lo único evidente fue la curva ascendente y la diferencia muy cerca de la significancia en el número de intentos (p=0,050). Ver tablas No. 3,4 y Figura No. 1.”

**Discusión:**

1. Es necesario ampliar la bibliografía.

Respuesta: Adicionamos artículos dentro de los márgenes permitidos en cantidad de referencias por la revista (30 referencias máximo) que apoyan nuestra discusión, hicimos ajustes de la bibliografía en la parte de introducción para lograr dar más opciones en cantidad de referencias permitidas en discusión, la discusión quedó soportada con referencias bibliográficas actualizadas incluso hasta 10 referencias apoyando las ideas. Agradecemos la sugerencia y la acatamos.

**Conclusión**

La conclusión podría ser más concisa. Por ejemplo: El entrenamiento en modelos simulados aumentar la tasa de éxito y disminuye las complicaciones de los bloqueos nerviosos guiados por ecografía ya que permite mejorar la identificación e interpretación de la imagen y permite desarrollar las habilidades necesarias para la buena visualización de la aguja y distribución del anestésico local.

**Respuesta:** Agradecemos la sugerencia y adoptamos por completo esta conclusión propuesta por el evaluador.

**Gráficos**

1. La información de los gráficos 1 y 2 es repetitiva. Considero que el gráfico 2 es suficiente para el lector.

**Respuesta:** De acuerdo, agradecemos su sugerencia. Retiramos una Grafica e incluimos en la gráfica No 1, la curva de éxito del bloqueo (grafica No 2) y equipo ajustado por número de intentos. Dejamos solo la gráfica Nº 1 que contiene toda la información antes representada en dos gráficas.

1. Es necesario una tabla con los datos demográficos de los pacientes que incluya el sexo, la edad, peso, ASA, tipo de cirugía entre otros.

**Respuesta:** nos acogemos a la sugerencia del evaluador y la agradecemos Adicionamos una tabla con los datos generales de los pacientes**.** Consignada como tabla 2.

Nuevamente Mil Gracias y Feliz año 2019, esperamos haber dado respuestas acordes y esperadas a lo solicitado por el evaluador, estamos muy agradecidos en la oportunidad ofrecida de poder publicar nuestro manuscrito en su prestigiosa revista.
